# Supplementary material for: Selective and sensitive on-site colorimetric detection of 4,4′-isopropylidenediphenol using non-enzymatic molecularly imprinted graphitic carbon nitride hybrids in milk and water samples
Source: Royal Society of Chemistry journal article supplement (doi:10.1039/d3nj01241g), 2023-01-01
Supplement: d3nj01241g1.pdf [file d3nj01241g1.pdf]

## Supplementary Information

### Selective and sensitive on-site colorimetric detection of 4,4' - Isopropylidenediphenol using non-enzymatic molecularly imprinted graphitic carbon nitride hybrids in milk and water samples

M. Komal, J. Vinoth Kumar, R. Arulmozhi, M. Sherlin Nivetha, S. Pavithra, N. Abirami\*

Department of Chemistry, College of Engineering and Technology, SRM Institute of Science and Technology, Kattankulathur, Tamil Nadu-603 203, India.

\*Corresponding author: e-mail: [abiramin@srmist.edu.in](mailto:abiramin@srmist.edu.in)

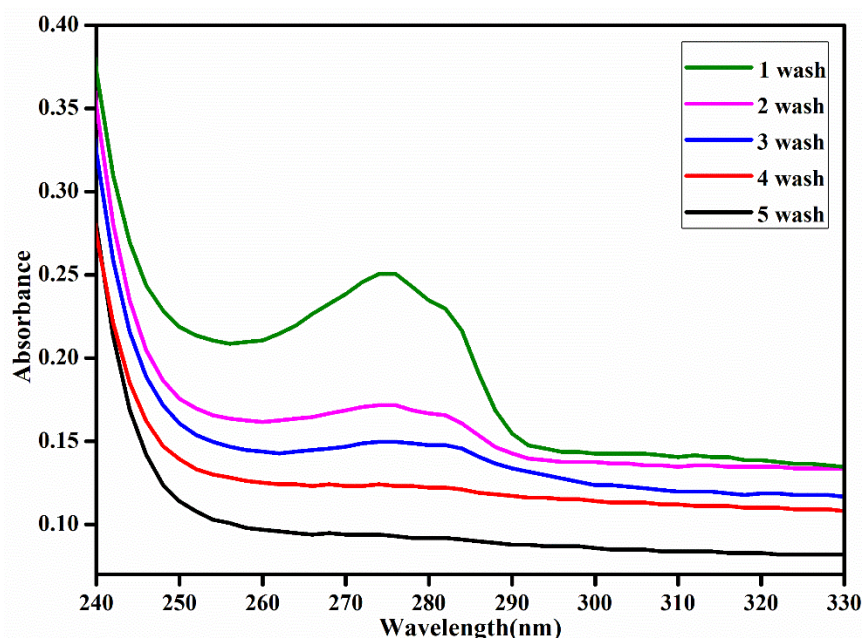

**Fig. S1** Extraction of the template (BPA) from MIP@g-C<sub>3</sub>N<sub>4</sub>.

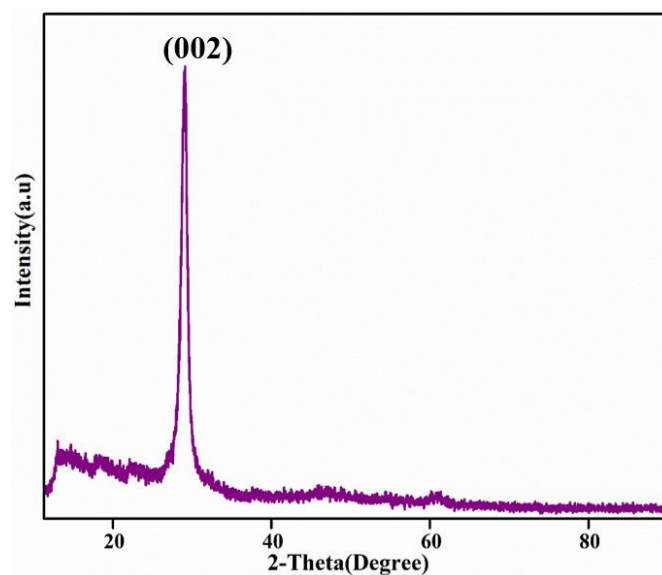

**Fig. S2** XRD spectrum of g-C<sub>3</sub>N<sub>4</sub>.

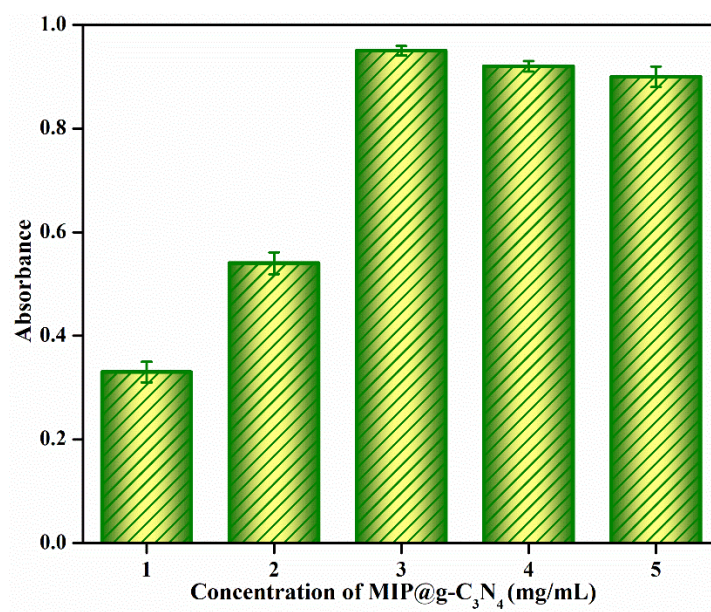

**Fig. S3** Effect of the concentration of MIP@g-C<sub>3</sub>N<sub>4</sub>.

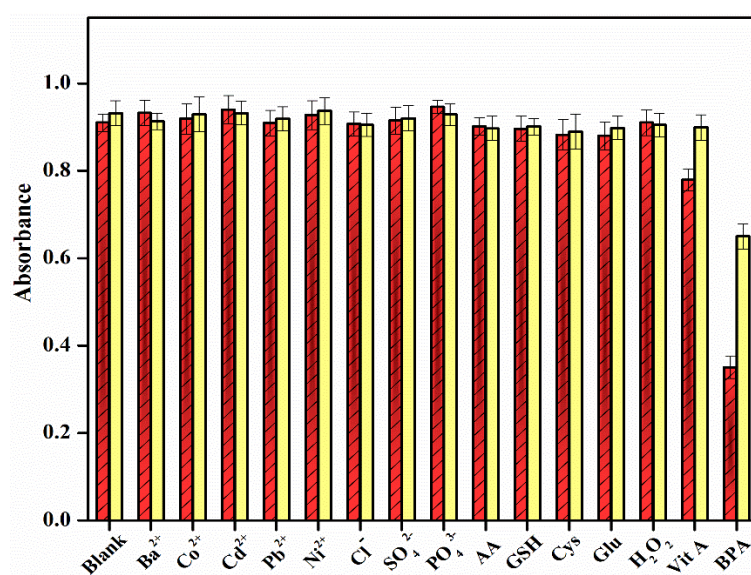

**Fig. S4** Selectivity of MIP@g-C<sub>3</sub>N<sub>4</sub> (red bar) and NIP@g-C<sub>3</sub>N<sub>4</sub> (yellow bar) with BPA and interfering species.

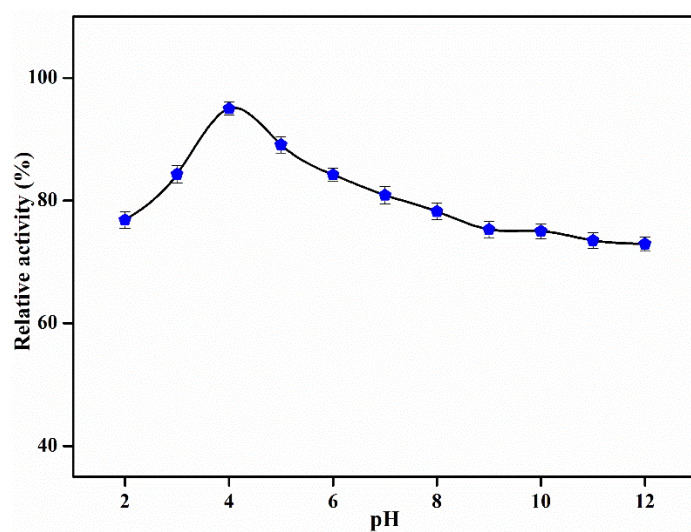

**Fig S5.** Stability analysis of MIP@g-C<sub>3</sub>N<sub>4</sub> in different pH.

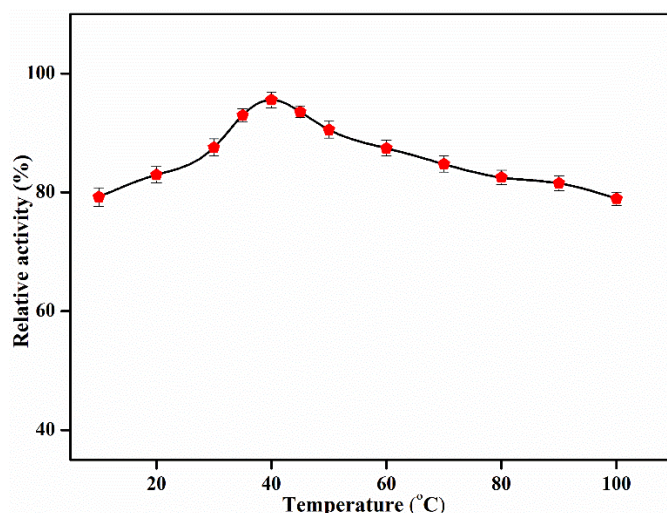

**Fig S6.** Stability analysis of MIP@g-C<sub>3</sub>N<sub>4</sub> in different temperatures.

### Kinetic analysis:

Kinetics studies were performed by determining the  $A_{652}$  nm with respect to reaction time. In order to quantify the catalytic efficiency and affinity for TMB, steady-state kinetic parameters, including Michaelis-Menten's constant ( $K_m$ ),  $[S]$  was the concentration of the substrate, and the maximum initial velocity value  $V_{max}$ , were calculated using a double-reciprocal method ( $1/V = (K_m/V_{max}) \times (1/[S]) + 1/V_{max}$ ).<sup>1</sup> The  $K_m$  value and the  $V_{max}$  value of the MIP@g-C<sub>3</sub>N<sub>4</sub> have been given in Table 1. The lower the  $K_m$  value is, the higher the affinity of the simulated object to the substrate. The higher the  $V_{max}$  value is, the higher the saturation reaction rate. Moreover, the obtained  $K_m$  value and the  $V_{max}$  value have been compared with other reported enzymes in order to show the efficiency of the MIP@g-C<sub>3</sub>N<sub>4</sub> hybrid nanocomposite which is shown below:

**Table S1** Comparison of  $K_m$  and  $V_{max}$  with other previously reported literature

| Catalyst                       | Substrate              | $K_m$ (mM) | $V_{max}$                        | Reference    |
|--------------------------------|------------------------|------------|----------------------------------|--------------|
| HRP                            | TMB                    | 0.275      | $1.24 (10^{-8} \text{ Ms}^{-1})$ | 2            |
|                                | $\text{H}_2\text{O}_2$ | 0.214      | $2.46 (10^{-8} \text{ Ms}^{-1})$ |              |
| g- $\text{C}_3\text{N}_4$      | TMB                    | 0.031      | $1.35 (10^4 \text{ Ms}^{-1})$    | 3            |
|                                | $\text{H}_2\text{O}_2$ | 4.565      | $1.72 (10^4 \text{ Ms}^{-1})$    |              |
| MnSe-g- $\text{C}_3\text{N}_4$ | TMB                    | 0.137      | $2.40 (10^{-3} \text{ s}^{-1})$  | 4            |
|                                | $\text{H}_2\text{O}_2$ | 0.623      | $2.85 (10^{-3} \text{ s}^{-1})$  |              |
| MIP@g- $\text{C}_3\text{N}_4$  | TMB                    | 0.122      | $1.39 (10^{-8} \text{ Ms}^{-1})$ | Current work |
|                                | $\text{H}_2\text{O}_2$ | 0.402      | $1.9 (10^{-8} \text{ Ms}^{-1})$  |              |

**Detection of BPA in real samples**

To determine BPA, we used this colorimetric detection platform in real-world samples such as human serum samples. The human serum samples were collected from a nearby healthcare clinic. The serum samples were diluted to 500- fold and then it was spiked with different concentrations of BPA. In addition, a recovery experiment using the standard addition approach was conducted, in which different BPA concentrations were introduced into the samples for analysis.

**Table S2** Investigation of BPA detection in the human blood serum samples.

| Sample | Spiked (nM) | Detected $\pm$ SD   | Recovery (%) |
|--------|-------------|---------------------|--------------|
|        |             | BPA                 | BPA          |
| Serum  | 5           | $4.85^x \pm 0.3^y$  | 95.7         |
|        | 10          | $9.91^x \pm 0.15^y$ | 98.5         |

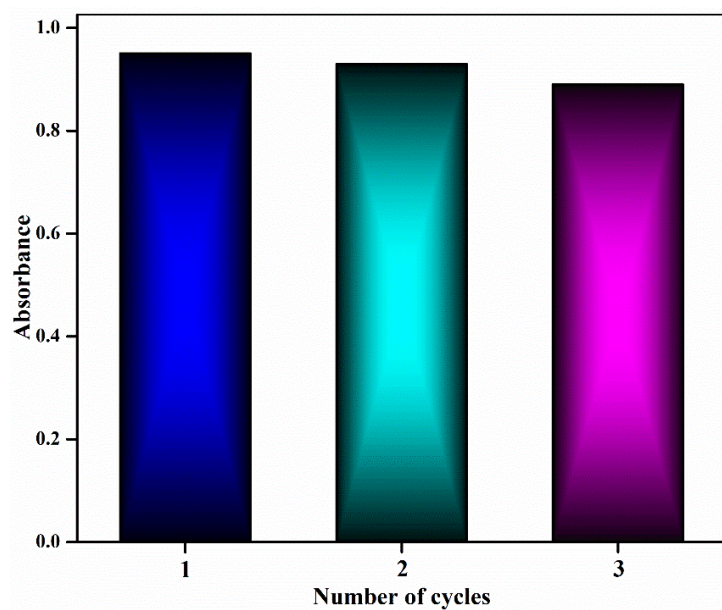

**Fig. S7** Reproducibility of MIP@g-C<sub>3</sub>N<sub>4</sub> nanocomposite colorimetric system.

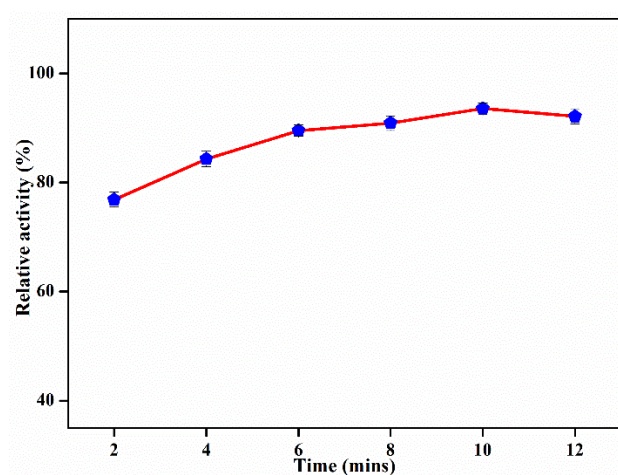

**Fig. S8** Effect of the time

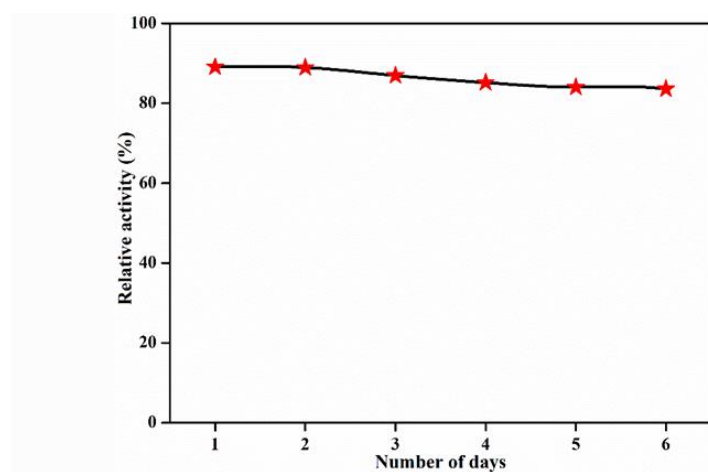

**Fig. S9** Stability analysis of MIP@g-C<sub>3</sub>N<sub>4</sub> in a number of days.

## References:

1. C. Song, W. Ding, W. Zhao, H. Liu, J. Wang, Y. Yao and C. Yao, *Biosens. Bioelectron.*, 2020, **151**, 111983.
2. Y. Song, K. Qu, C. Zhao, J. Ren and X. Qu, *Adv. Mater.*, 2010, **22**, 2206–2210.
3. J. Tian, Q. Liu, A. M. Asiri, A. H. Qusti, A. O. Al-Youbi and X. Sun, *Nanoscale*, 2013, **5**, 11604–11609.
4. F. Qiao, Q. Qi, Z. Wang, K. Xu and S. Ai, *Sensors Actuators, B Chem.*, 2016, **229**, 379–386.
